# Supplementary material for: The Sound and the Fury—Bees Hiss when Expecting Danger
Source: PubMed Central journal article supplement (PMC4351880; doi:10.1371/journal.pone.0118708), 2015-03-06

# Example bee 1

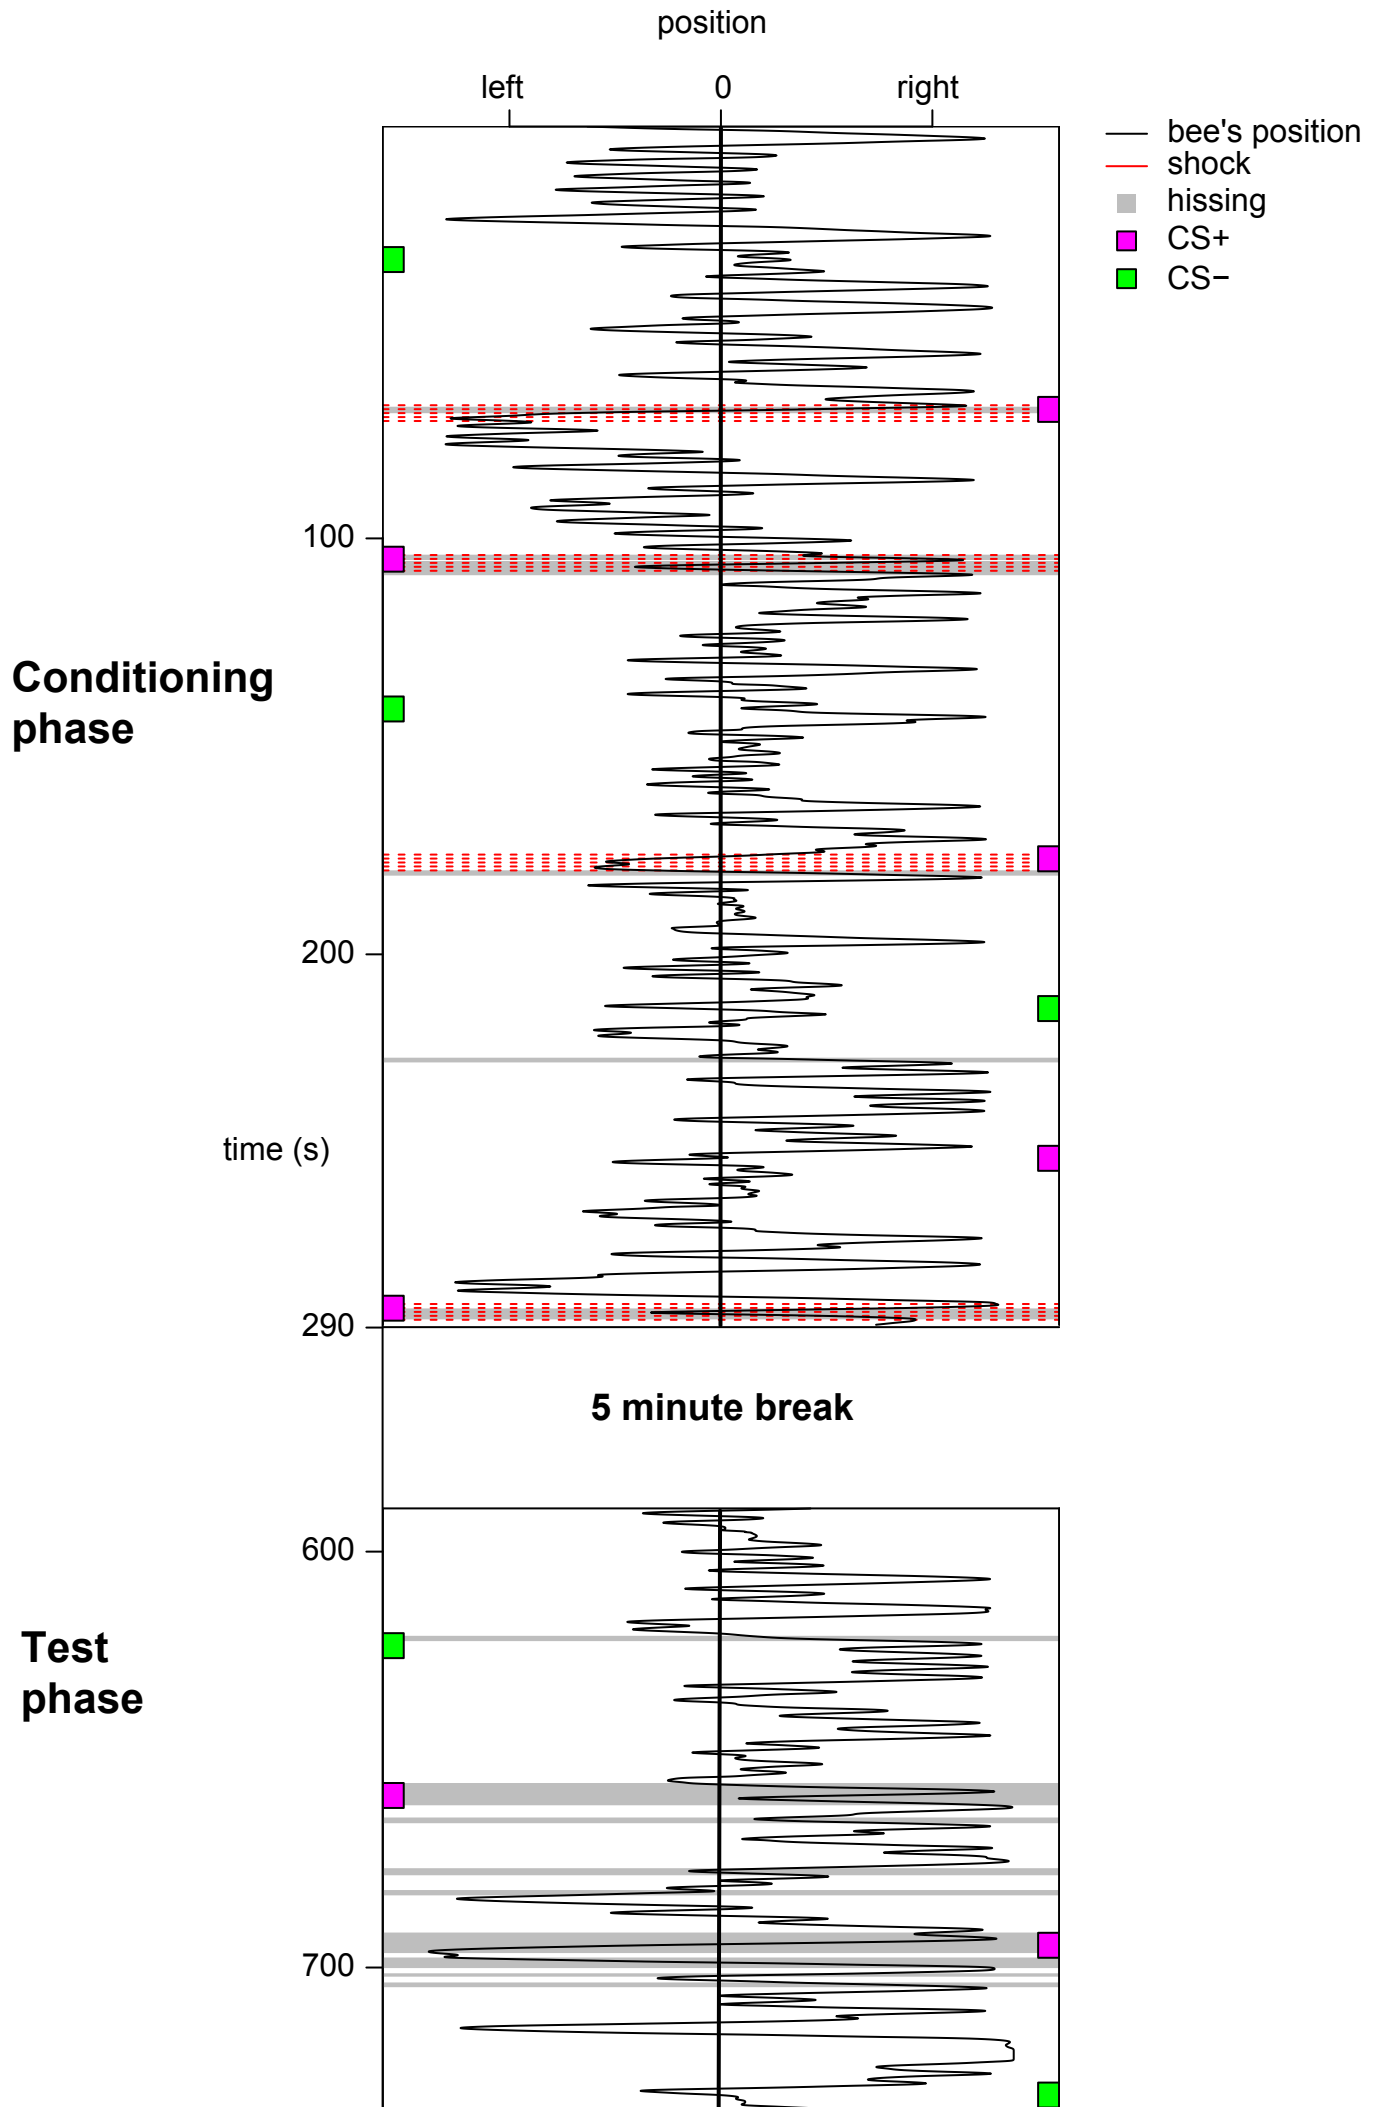



# Example bee 3

position

left

0

right

- bee's position
- shock
- hissing
- CS+
- CS-

**Conditioning phase**

time (s)

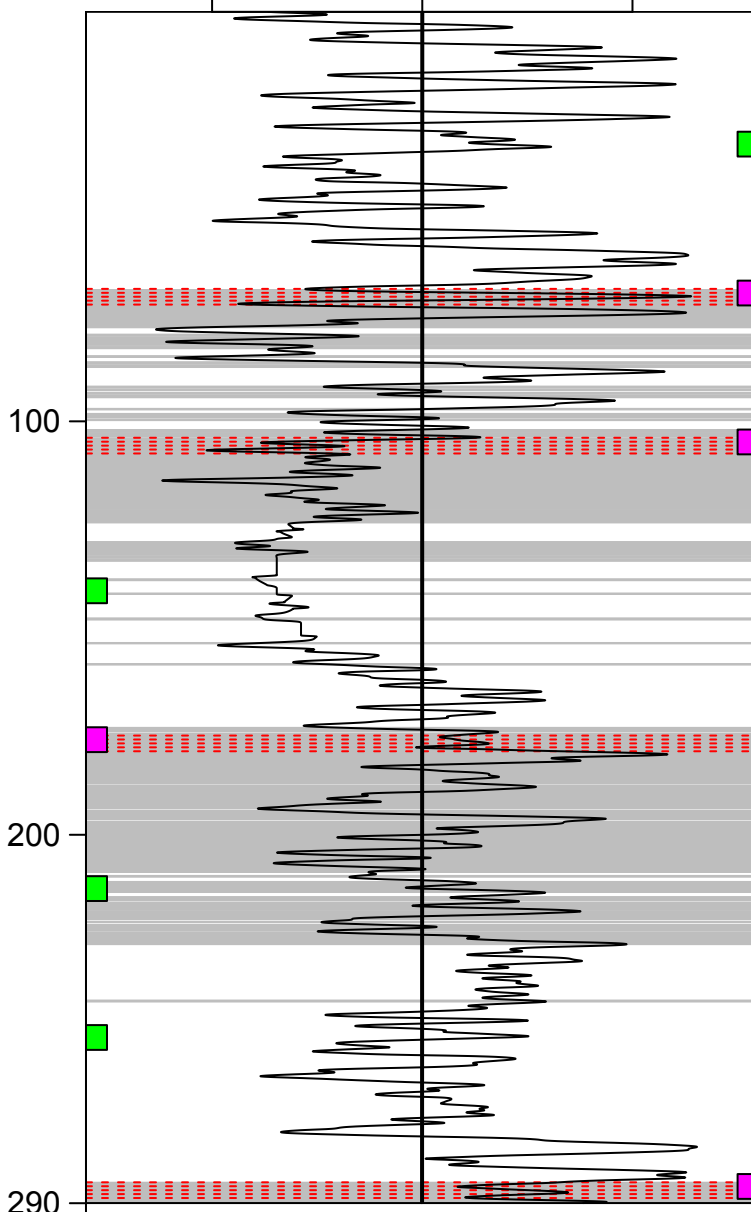

**5 minute break**

**Test phase**

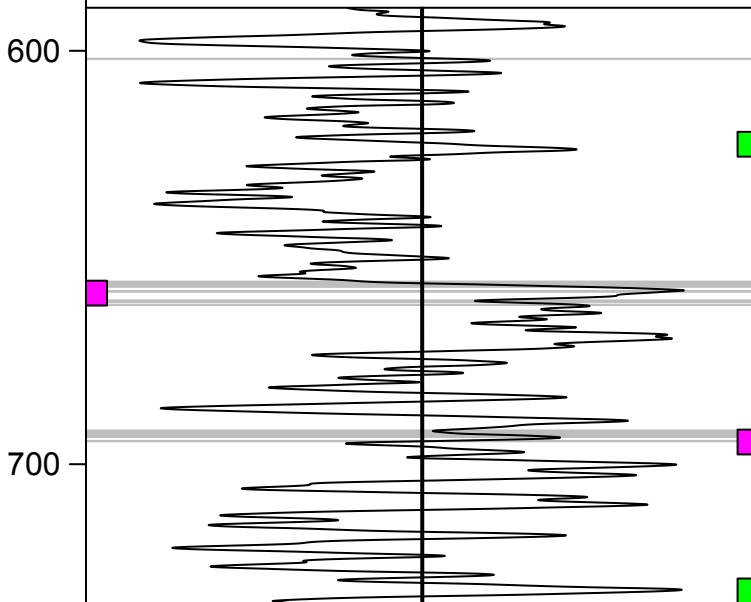

Supplement: pone.0118708.s001.pdf [file pone.0118708.s001.pdf]
