# Supplementary material for: The Sound and the Fury—Bees Hiss when Expecting Danger
Source: PubMed Central journal article supplement (PMC4351880; doi:10.1371/journal.pone.0118708), 2015-03-06

# Example bee 3 - spectrogram

clicking valve

clicking valve of neighbouring setup

0 1:00 2:00 3:00 4:00 5:00 6:00 7:00 8:00 9:00 10:00 11:00 12:00

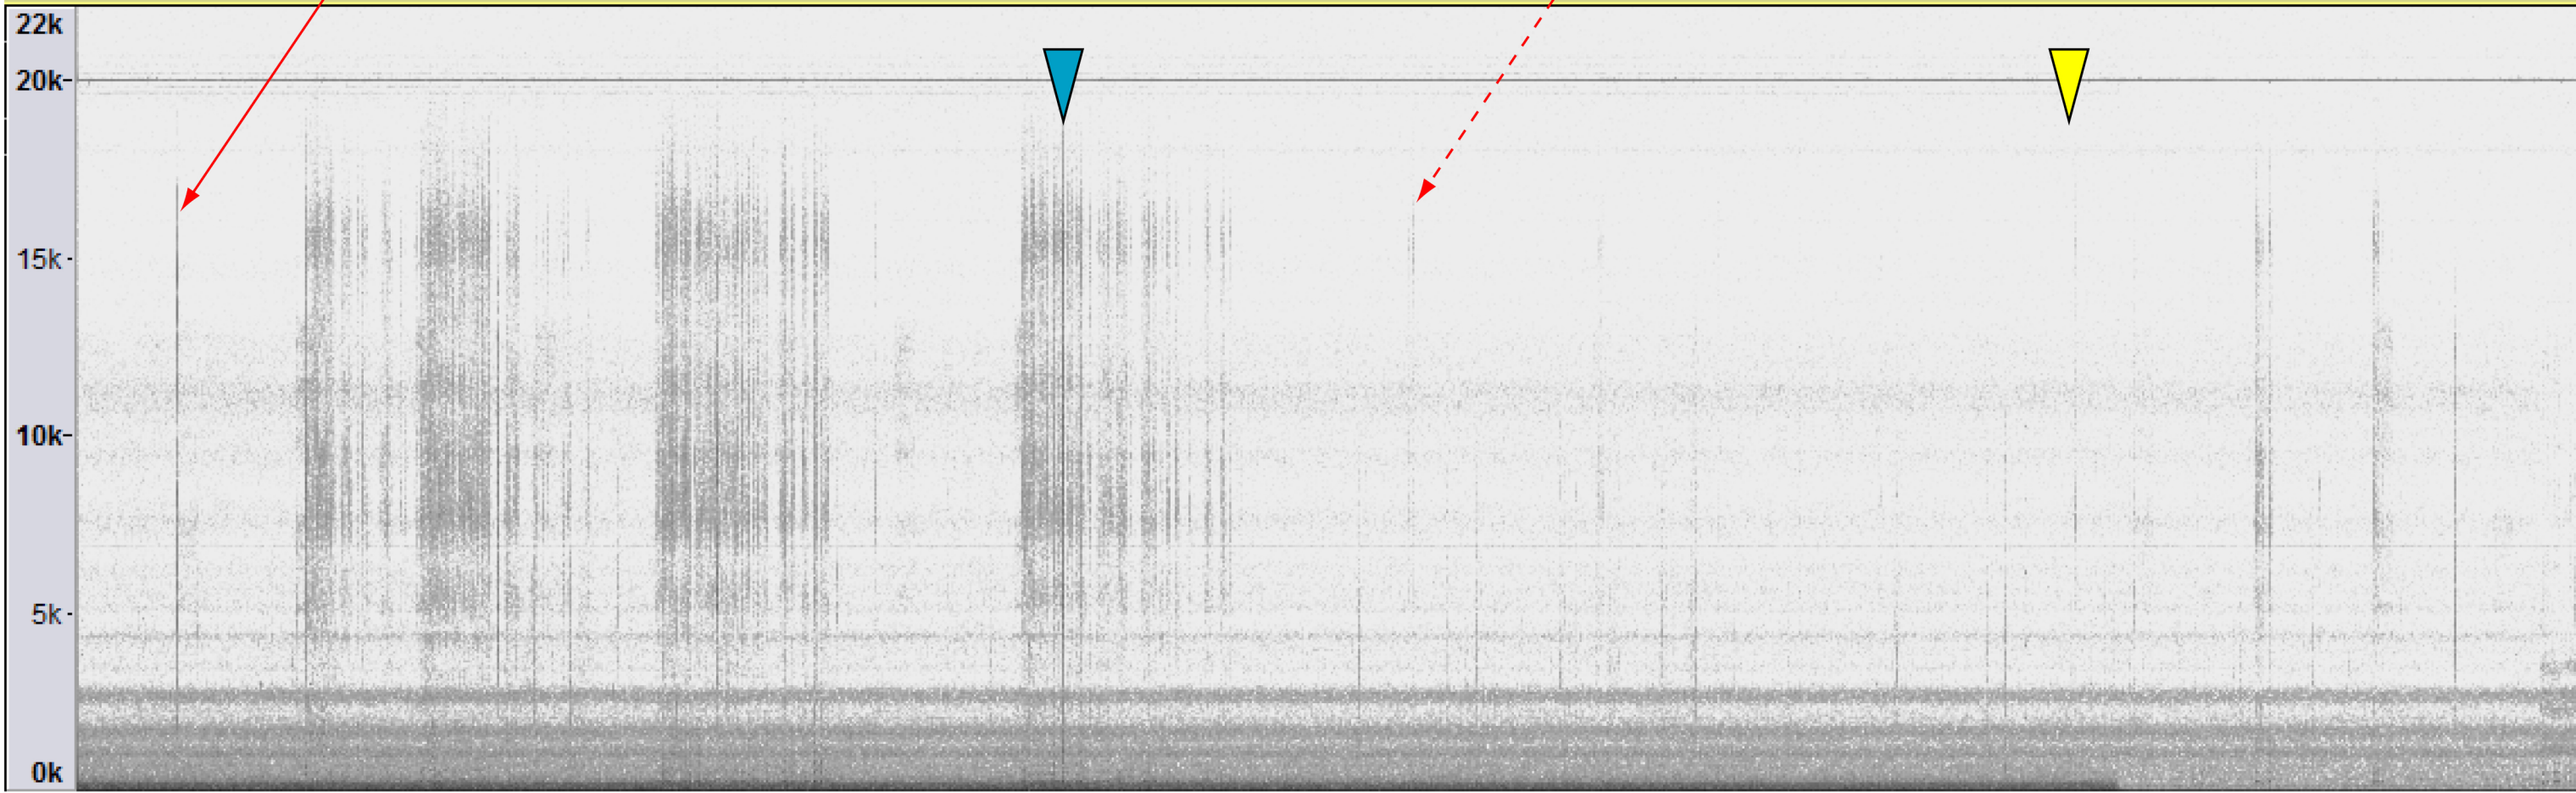

analysed hissing

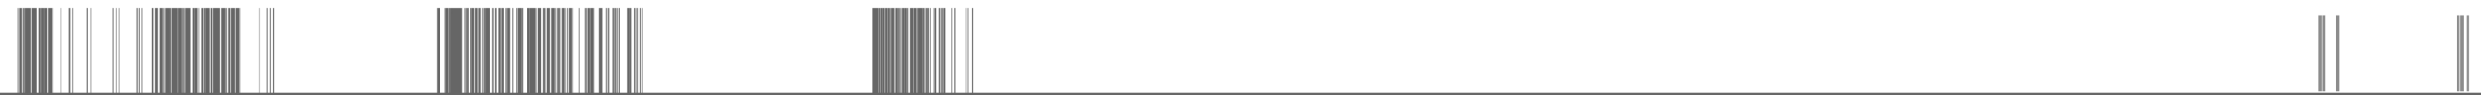

Supplement: pone.0118708.s002.pdf [file pone.0118708.s002.pdf]
