# Supplementary material for: The Sound and the Fury—Bees Hiss when Expecting Danger
Source: PubMed Central journal article supplement (PMC4351880; doi:10.1371/journal.pone.0118708), 2015-03-06

a

**Histogram of all "hiss" lengths (bins 0.05 s)**

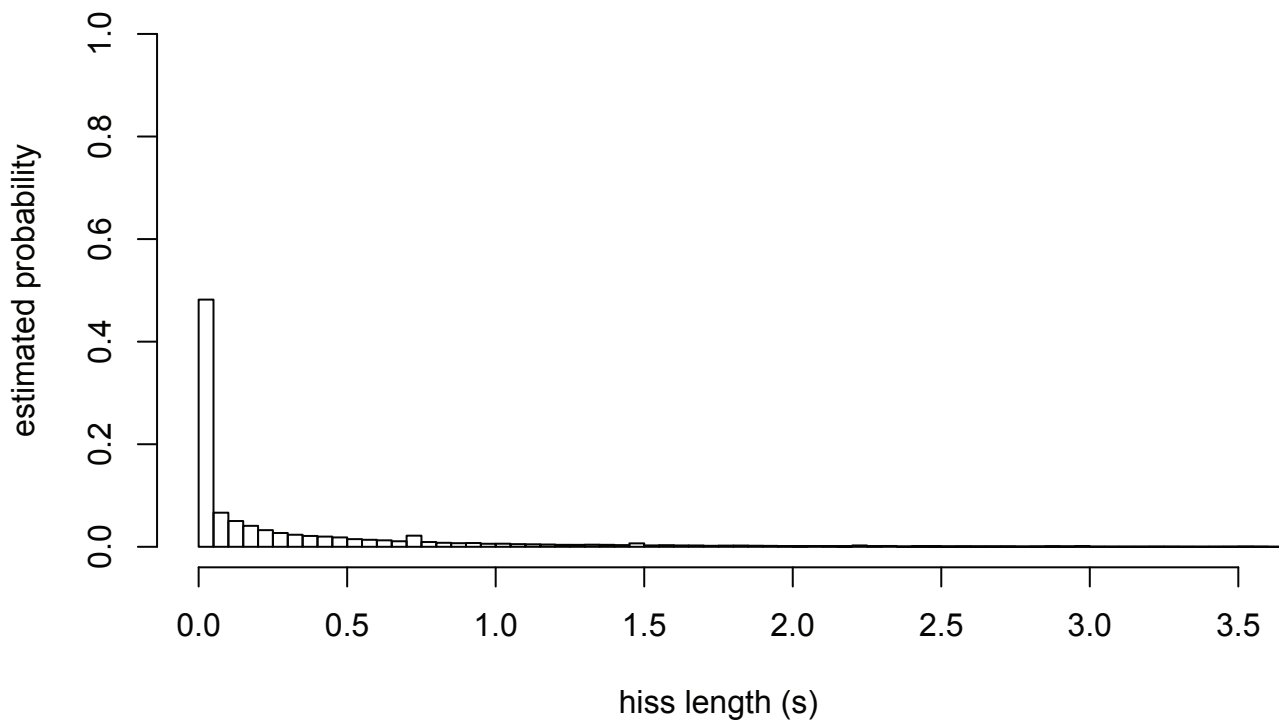

b

**Histogram of longer hiss lengths (bins 0.05 s)**

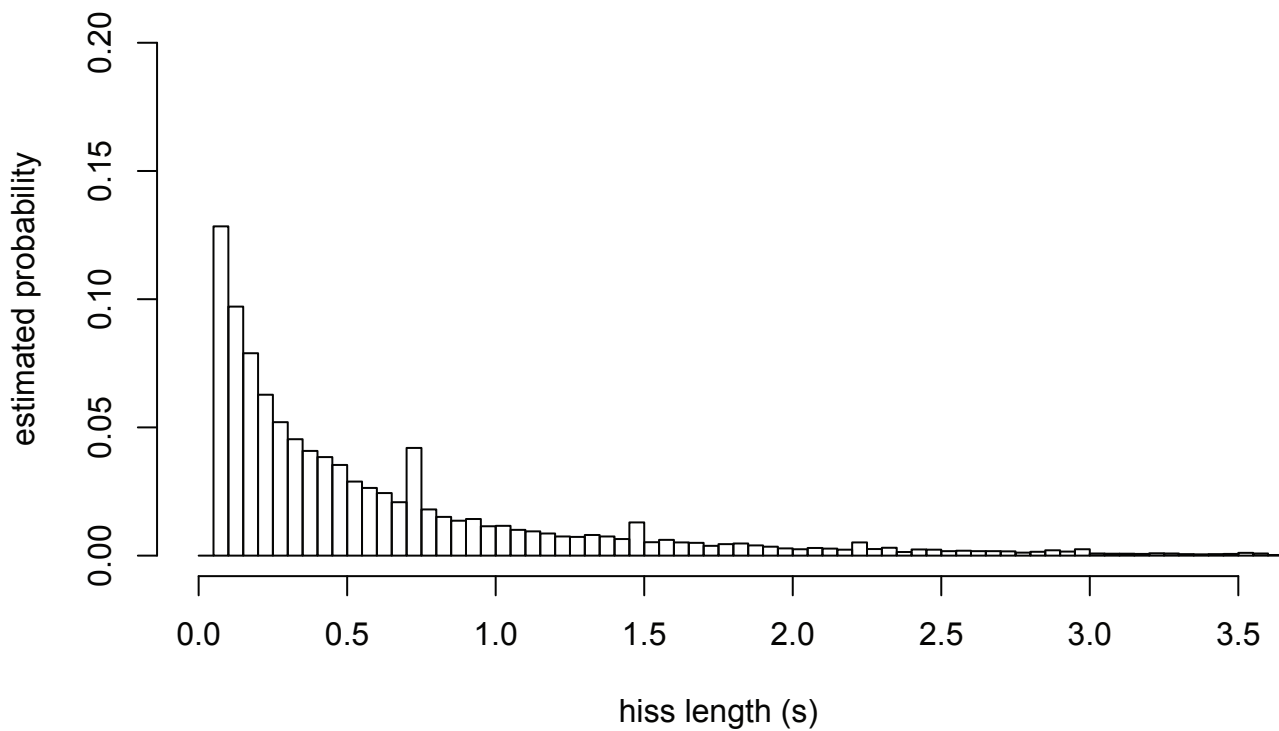

Supplement: pone.0118708.s003.pdf [file pone.0118708.s003.pdf]
