# Supplementary material for: The Sound and the Fury—Bees Hiss when Expecting Danger
Source: PubMed Central journal article supplement (PMC4351880; doi:10.1371/journal.pone.0118708), 2015-03-06

a

### hissing time/duration plot for all CS+

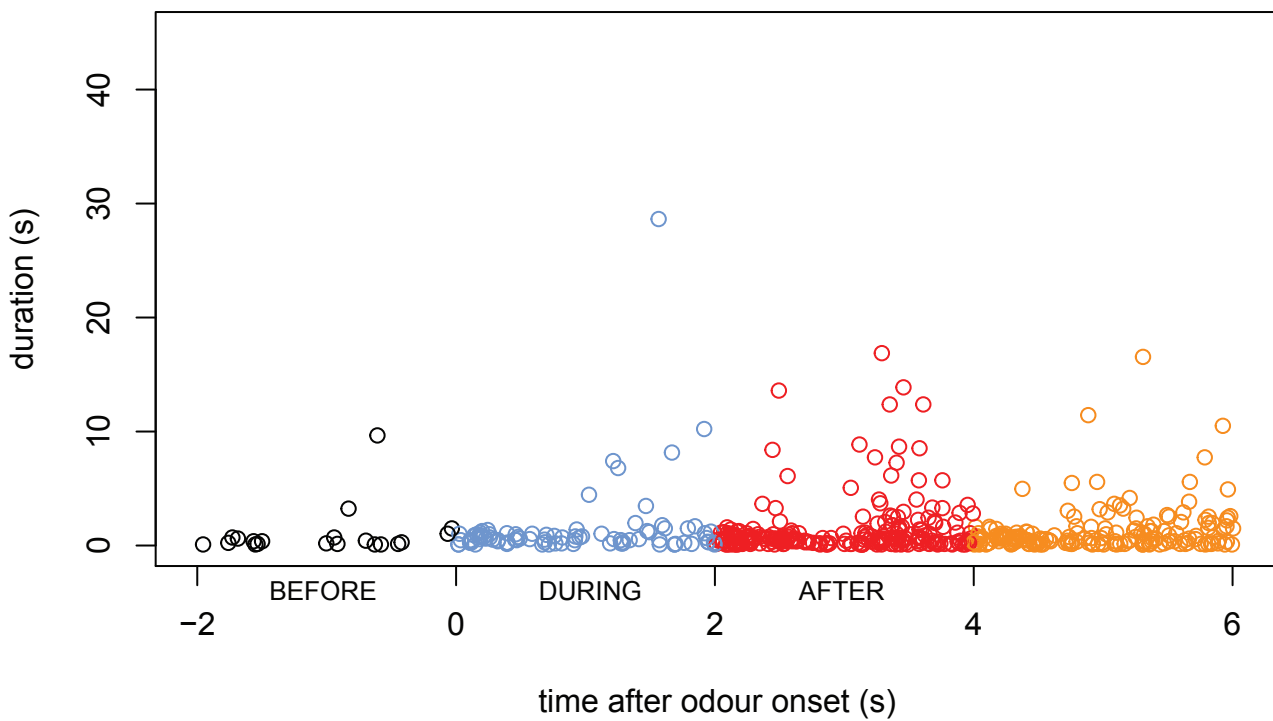

b

### hissing time/duration plot for all CS-

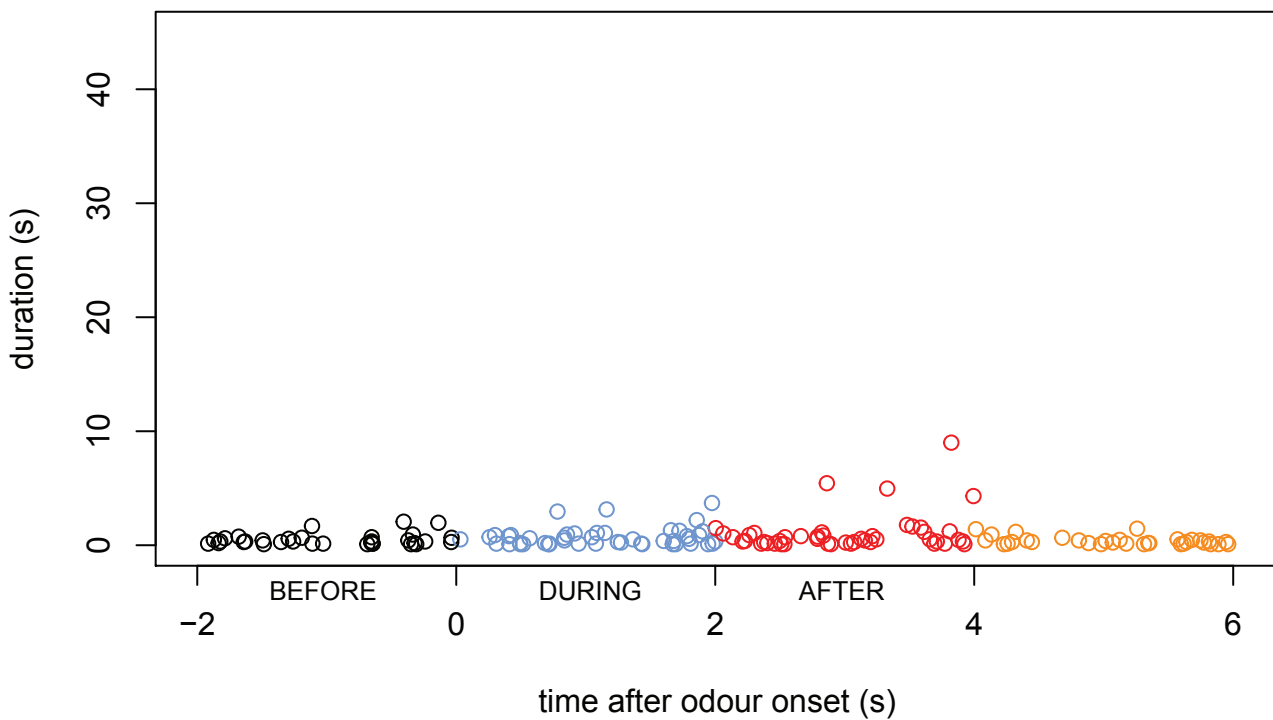

Supplement: pone.0118708.s012.pdf [file pone.0118708.s012.pdf]
